# Supplementary material
Source: Elsevier journal article supplement (https://www.sciencedirect.com/science/article/pii/S2341287922001314)
Supplement: mmc1 [file S2341287922001314:mmc1.docx]

**TABLAS SUPLEMENTARIAS**

**Tabla S1. Características perinatales, neurológicas y de la afectación sistémica en los 5 hospitales participantes en el estudio**

|  | HUBU  N= 45 | HURH  N= 34 | HCUV  N= 23 | HCUS  N= 19 | CAULE  N= 12 |
| --- | --- | --- | --- | --- | --- |
| Extramuros | 24/45 (53) | 18/34 (53) | 10/23 (43) | 3/19 (16) | 2/12 (17) |
| Sexo, mujer | 20/45 (44) | 14/34 (41) | 10/23 (43) | 4/19 (21) | 4/12 (33) |
| Edad gestacional, semanas | 39 (38; 40) | 39 (36;41) | 39 (36;39) | 39 (37; 40) | 38 (37; 40) |
| Peso nacimiento, gramos | 3040(2700; 3515) | 3200 (2667; 3425) | 2620 (2200; 3200) | 3370 (2952; 3713) | 3322 (3050; 3500) |
| Parto eutócico | 5/45 (11) | 4/34 (12) | 4/23 (17) | 2/19 (11) | 3/12 (25) |
| Presentación cefálica | 42/43 (98) | 32/33 (97) | 18/19 (95) | 17/18 (94) | 9/12 (75) |
| Evento centinela | 16/45 (36) | 16/32 (50) | 7/23 (30) | 4/19 (21) | 4/12 (33) |
| Apgar 1 min* | 1 (0; 2) | 2 (1; 3) | 1,5 (1; 5) | 3 (1; 3) | 2 (0; 4) |
| Apgar 5 min* | 3 (2; 5) | 4 (2; 6) | 4,5 (3; 7) | 4 (3; 6) | 5 (4; 8) |
| Apgar 10 min** | 4 (3; 6) | 5,5 (4; 7) | 7 (5; 8) | 5 (4; 7) | 6 (4; 10) |
| pH cordón*** | 6,88 (6,80; 7,05) | 7,02 (6,81; 7,20) | 6,97 (6,84; 7,15) | 7,12 (6,94; 7,24) | 6,98 (6,79; 7,21) |
| Reanimación avanzada | 35/45 (78) | 27/34 (79) | 17/23 (74) | 14/19 (74) | 9/12 (75) |
| Clasificación de EHI | 45 | 34 | 23 | 19 | 12 |
| Moderada | 32 (71) | 25 (74) | 17 (74) | 14 (74) | 8 (67) |
| Grave | 13 (29) | 9 (26) | 6 (26) | 5 (26) | 4 (33) |
| Trazado aEEG patológico | 35/45 (78) | 33/34 (97) | 23/23 (100) | 15/19 (79) | 10/12 (83) |
| Crisis clínico y/o eléctricas | 14/45 (31) | 17/34 (50) | 10/23 (43) | 2/19 (11) | 7/12 (58) |
| Afectación pulmonar | 35/45 (78) | 15/34 (44) | 10/23 (43) | 13/19 (68) | 8/12 (67) |
| Uso de óxido nítrico | 8/45 (18) | 1/34 (3) | 2/23(9) | 2/19 (11) | 5/12 (42) |
| Ventilación mecánica | 43/45 (96) | 34/34 (100) | 21/23 (91) | 19/19 (100) | 9/12 (75) |
| Uso de inotrópicos | 43/45 (96) | 24/34 (71) | 13/23 (57) | 12/19 (63) | 8/12 (67) |
| Afectación renal | 12/45 (27) | 18/34 (53) | 10/23 (43) | 8/19 (42) | 4/12 (33) |
| Afectación hepática | 32/45 (71) | 22/34 (65) | 16/23 (70) | 10/19 (53) | 7/12 (58) |
| Coagulopatía | 29/45 (64) | 12/34 (35) | 19/23 (83) | 12/19 (63) | 6/12 (50) |
| Trombocitopenia | 38/45 (84) | 13/34 (38) | 12/23 (52) | 10/19 (53) | 3/12 (25) |
| Afectación gastrointestinal | 8/45 (18) | 2/34 (6) | 1/23(4) | 4/19 (21) | 1/12 (8) |
| Sepsis | 1/45 (2) | 1/34 (3) | 2/23 (9) | 1/19 (5) | 1/12 (8) |
| Fallecimiento | 9/44 (20) | 8/34 (24) | 2/23 (9) | 6/19 (32) | 2/12 (17) |
| Edad fallecimiento, horas | 45 (16; 84) | 36 (23; 143) | 68 (40;-) | 23,5(10; 85) | 72 (60;-) |
| Adecuación del esfuerzo terapéutico | 7/9 (78) | 5/8 (63) | 1/2 (50) | 5/6 (83) | 1/1 (100) |

Las variables categóricas se expresan en n (%) y las continuas en mediana (P25; P75).

aEEG: electroencefalograma integrado por amplitud; CAULE: complejo asistencial universitario de León; HCUS: hospital clínico universitario de Salamanca; HCUV: hospital clínico universitario de Valladolid; HUBU: hospital universitario de Burgos; HURH: hospital universitario Rio Hortega de Valladolid; Tª: temperatura.

Definiciones. Reanimación avanzada: intubación y/o masaje cardiaco y/o fármacos. Afectación pulmonar: necesidad de oxígeno suplementario y/o hipertensión pulmonar y/o utilización de óxido nítrico. Afectación renal: creatinina > 1,5mg/dl. Afectación hepática: hipertransaminasemia AST y/o ALT > 100U/L. Afectación gastrointestinal: hemorragia y/o enterocolitis necrotizante. Coagulopatía: parámetros de coagulación alterados que requiere trasfusión de plasma fresco congelado y/o factores de coagulación. Plaquetopenia: plaquetopenia que requirió trasfusión de plaquetas. Sepsis: infección con hemocultivo positivo. aEEG patológico: incluye trazado discontinuo, bajo voltaje, brote supresión, o plano.

**Tabla S2. Características relacionadas con la aplicación de la hipotermia de los 5 hospitales participantes en el estudio**

|  | HUBU  N= 45 | HURH  N= 34 | HCUV  N= 23 | HCUS  N= 19 | CAULE  N= 12 |
| --- | --- | --- | --- | --- | --- |
| Apagado calor en paritorio | 34/36 (96) | 22/29 (76) | 13/20 (65) | 17/19 (89) | 11/11 (100) |
| Extramuros: Tª llegada hospital receptor | 33,3 (33; 34,5) | 33 (32,6; 33,7) | 34,3 (33,7;35,3) | 34(31,5;-) | 34,3 (34,2;-) |
| Edad de alcance de la Tª central diana (33-34º C) | 1 (1; 4) | 5 (2; 6) | 4,5 (2,9; 5,3) | 3,5 (2; 6) | 6,5 (1,3; 7) |
| Inicio de hipotermia activa, hdv | 5 (3,5; 7) | 5,5 (4; 7) | 5 (4; 6) | 4 (3; 6) | 4 (3; 5,7) |
| Duración del recalentamiento, h | 8 (6; 9) | 10 (9; 12) | 11,5 (10; 14) | 9 (8; 13) | 8 (7; 12) |
| Modificación de la Tª diana | 14/45 (31) | 5/34 (15) | 1/23(4) | 4/19 (21) | 3/12(25) |
| Retirada de HT antes de las 72h | 3/45 (7) | 1/34 (3) | 0/23 (0) | 2/19 (11) | 2/12 (17) |
| Sedación | 44/45 (98) | 30/34 (88) | 23/23 (100) | 19/19 (100) | 12/12 (100) |
| Bolos | 3/45 (7) | 1/34 (3) | 2/23 (9) | 1/19 (5) | 0/12 (0) |
| Perfusión | 4/45 (9) | 28/34 (82) | 14/23 (61) | 7/19 (37) | 9/12 (75) |
| Perfusión y bolos | 37/45 (82) | 1/34 (3) | 7/23 (30) | 11/19 (58) | 3/12 (25) |
| Fármacos |  |  |  |  |  |
| Fentanilo | 10/45 (22) | 15/34 (44) | 16/23 (70) | 9/19 (47) | 4/12 (33) |
| Fentanilo/mórfico + midazolam | 33/45 (73) | 14/34 (41) | 5/23 (22) | 10/19 (53) | 8/12 (67) |
| Nutrición parenteral | 39/45 (87) | 4/34(12) | 22/23 (96) | 7/19 (37) | 9/12 (75) |
| Nutrición enteral | 0/45 (0) | 5/34(15) | 2/23 (9) | 6/19 (32) | 0/12 (0) |
| Canguro | 5/45 (11) | 0/34 (0) | 1/23 (4) | 0/19 (0) | 0/12 (0) |
| Neuro-monitorización con |  |  |  |  |  |
| aEEG | 45/45 (100) | 34/34 (100) | 23/23 (100) | 19/19 (100) | 12/12 (100) |
| SrO2 cerebrala | 45/45 (100) | 3/34(9) | 23/23 (100) | 0/19 (0) | 7/12(58) |
| Se realiza ecografía-doppler | 42/45 (93) | 34/34 (100) | 21/23(91) | 19/19 (100) | 12/12 (100) |
| Se realiza EEG convencional | 22/45 (49) | 24/34 (71) | 22/23 (96) | 14/19 (74) | 8/12 (67) |
| Se realiza enolasa en LCRb | 41/45 (91) | 0/34 (0) | 8/23 (35) | 7/19(37) | 0/12 (0) |
| Se realiza RM | 36/45 (80) | 28/34 (82) | 21/23 (91) | 13/19(68) | 9/12 (75) |
| Edad, días | 12 (9;16) | 9 (7;11) | 8 (7;15) | 12 (10;19) | 17 (13;19) |

Las variables categóricas se expresan en n (%) y las continuas en mediana (P25; P75).

aEEG: electroencefalograma integrado por amplitud; hdv: horas de vida; HT: hipotermia terapéutica activa. LCR: líquido cefalorraquídeo; RM: resonancia magnética cerebral; SrO2 cerebral: saturación regional de oxígeno cerebral. Tª: temperatura

a El hospital HURH monitorizó al 100% de los RN una vez dispuso de esta monitorización a partir de octubre de 2018; el hospital HCUS no dispone de monitorización SrO2 cerebral.

b Este dato expresa aquellos pacientes en los que se pudo determinar el valor de ENE; desconocemos en qué pacientes no se realizó la punción lumbar por estar contraindicada o aquellos casos de punción traumática en los que el valor de ENE no se determinó.
